# Supplementary material for: The apple DNA-binding one zinc-finger protein MdDof54 promotes drought resistance
Source: PubMed Central journal article supplement (PMC7704620; doi:10.1038/s41438-020-00419-5), 2020-12-01
Supplement: 41438_2020_419_MOESM1_ESM.pdf [file 41438_2020_419_MOESM1_ESM.pdf]

**Supplemental Table 1. Primers used in this study.**

| Primer Name           | Primer Sequence (5' to 3')                                      | Purpose                                                            |
|-----------------------|-----------------------------------------------------------------|--------------------------------------------------------------------|
| MdDof54 qPCR F        | CCAGGCTCTCACAGACTGAC                                            | qRT-PCR analysis                                                   |
| MdDof54 qPCR R        | CAGGGGTAGTGGAGTTGTGG                                            |                                                                    |
| MdDof54 full length F | ATGTTACAGATCCTACTGTAAACAAAT                                     | Clone full-length gene                                             |
| MdDof54 full length R | CATAGATCGTGAGAAAACCTCAAACC                                      |                                                                    |
| MdDof54 RNAi F        | GGGGACAAGTTTGTACAAAAAAGCAGGCTGCACCACAA<br>CTCCACTACCCCT         | Plasmid construction for<br>MdDof54 RNAi plants                    |
| MdDof54 RNAi R        | GGGGACCACTTTGTACAAGAAAGCTGGGTCTTGCACCAC<br>TTGGTCTTCGT          |                                                                    |
| MdDof54 OE F          | GGGGACAAGTTTGTACAAAAAAGCAGGCTGCATGTTTAC<br>AGATCCTACTGTAAACAAAT | Plasmid construction for<br>MdDof54 OE plants                      |
| MdDof54 OE R          | GGGGACCACTTTGTACAAGAAAGCTGGGTCCATAGATCG<br>TGAGAAAACCTCAAACC    |                                                                    |
| MdDof54 atb ns F      | GGGGACAAGTTTGTACAAAAAAGCAGGCTGCATGTTTAC<br>AGATCCTACTGTAAACAAAT | Plasmid construction for<br>MdDof54 subcellular<br>localization    |
| MdDof54 atb ns R      | GGGGACCACTTTGTACAAGAAAGCTGGGTGATCGTGA<br>GAAAACCTCAAACC         |                                                                    |
| MdWRKY70-qpcr-F       | GCCCTGATCTTTGGCCATCT                                            | qRT-PCR analysis                                                   |
| MdWRKY70-qpcr-R       | AATGGACGACGAGGATGAGC                                            |                                                                    |
| MdFER-qpcr-F          | GGGCGTATTAAGGTCGATGGGGATG                                       | qRT-PCR analysis                                                   |
| MdFER-qpcr-R          | GATGAGGTTTGGGTGGCGGAGC                                          |                                                                    |
| MdEXP1-qpcr-F         | ACTCTTTCCTCAACGGCCAG                                            | qRT-PCR analysis                                                   |
| MdEXP1-qpcr-R         | AGTTTATGGTGTGTTTTCAGAACTGT                                      |                                                                    |
| MdPLP2-qpcr-F         | TTGAAGAAGCCGGTGTACAG                                            | qRT-PCR analysis                                                   |
| MdPLP2-qpcr-R         | GCCTAATTAAGCTTCTTTCCTTCCG                                       |                                                                    |
| MdLAC15-qpcr-F        | CCACCCAGAATGCCACCTTG                                            | qRT-PCR analysis                                                   |
| MdLAC15-qpcr-R        | AGGCCTAGATCATGCCACA                                             |                                                                    |
| MdPSK4-qpcr-F         | ACATGTCGTCCAAGCTCACC                                            | qRT-PCR analysis                                                   |
| MdPSK4-qpcr-R         | CGTCATGCCGATAATGCAAG                                            |                                                                    |
| MdGATA22-qpcr-F       | GCTGAAGCTGCAATCCTCCT                                            | qRT-PCR analysis                                                   |
| MdGATA22-qpcr-R       | GCAAACCCACAGAAAAGGAACGA                                         |                                                                    |
| MdXTH32-qpcr-F        | TGCTTACAGATTGGGAGTTC                                            | qRT-PCR analysis                                                   |
| MdXTH32-qpcr-R        | TTGGCAAGTAATGACCCATCTC                                          |                                                                    |
| MdWER-qpcr-F          | TAAAGTCACAGAGGTGCGGC                                            | qRT-PCR analysis                                                   |
| MdWER-qpcr-R          | TCAAGGACCATCTGTTGCCA                                            |                                                                    |
| MdDof54-EcoRIp42a-F   | GGATATCGGGGATCCGAATTCATGTTTACAG<br>ATCCTACTGTAAACAAAT           | Plasmid construction for<br>MdDof54 Expressing<br>protein in vitro |
| MdDof54-Sallp42a-R    | GAGTGCGGCCGCAAGCTTGTGCGACAGA<br>TCGTGAGAAAACCTCAAACC            |                                                                    |
