# Supplementary material for: The apple DNA-binding one zinc-finger protein MdDof54 promotes drought resistance
Source: PubMed Central journal article supplement (PMC7704620; doi:10.1038/s41438-020-00419-5), 2020-12-01
Supplement: 41438_2020_419_MOESM2_ESM.pdf [file 41438_2020_419_MOESM2_ESM.pdf]

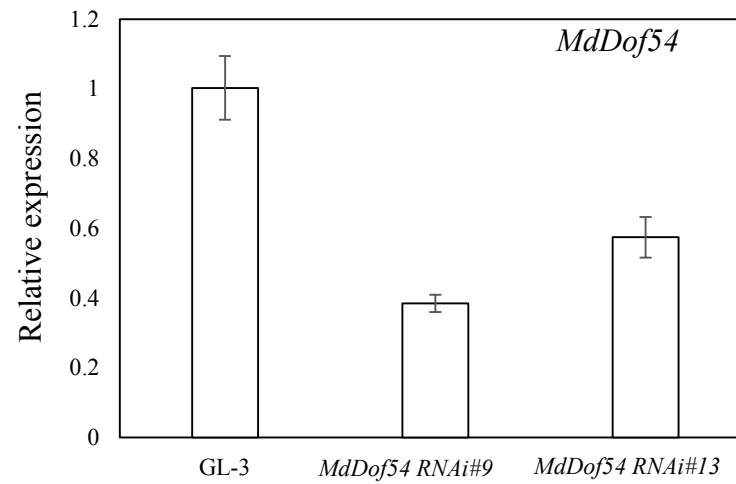

**Supplementary Figure 2. Generation of *MdDof54* RNAi plants.**

*MdDof54* mRNA levels were detected in the *MdDof54* RNAi plants.

Error bars indicate standard deviation ( $n = 3$ ).

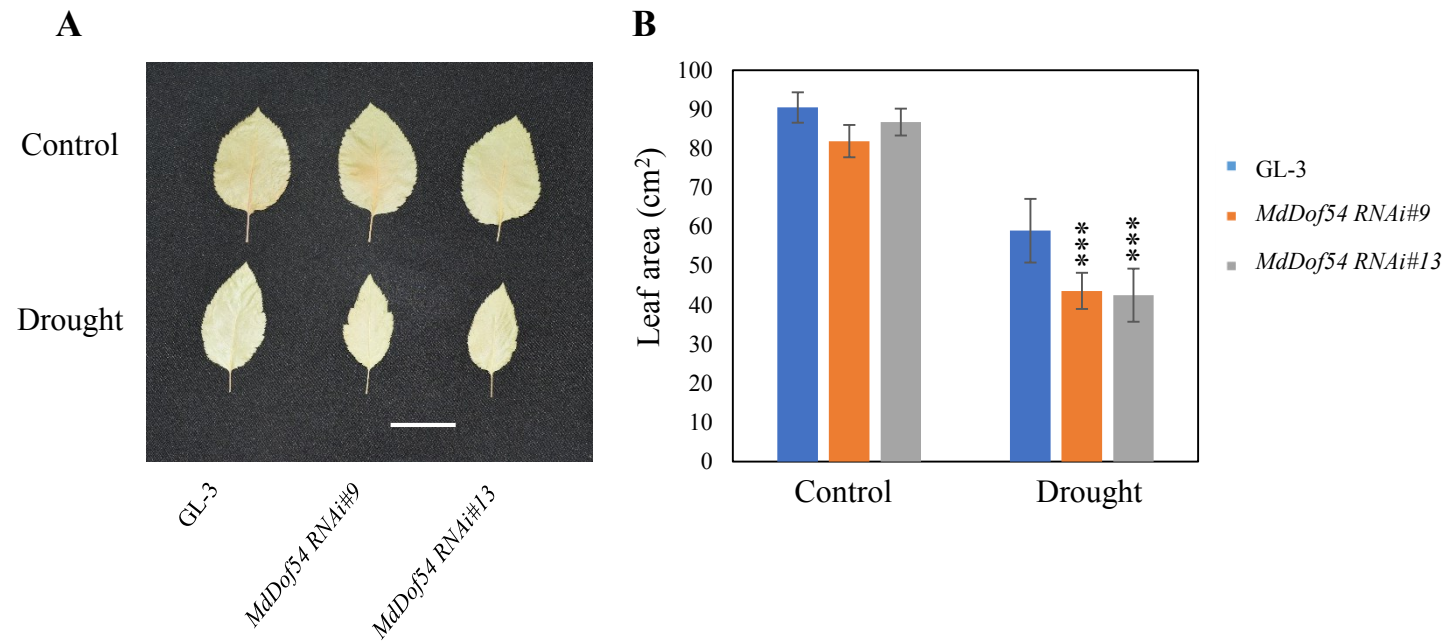

**Supplementary Figure 3. Leaf area of *MdDof54* RNAi plants under long-term drought stress.** Two-month-old plants were transferred to a greenhouse for one additional month and then exposed to a moderate drought treatment for two months. Oven-dried leaf (A) and leaf area (B) of GL-3 and *MdDof54* RNAi plants after drought stress. Asterisks indicate significant differences between GL-3 and transgenic lines based on one-way ANOVA and Tukey's test (\*,  $p < 0.05$ ; \*\*,  $p < 0.01$ ; \*\*\*,  $p < 0.001$ ). Error bars indicate standard deviation ( $n = 15$ ).

## Supplementary Figure 4. Gene Ontology (GO) analysis of differentially expressed genes in *MdDof54* RNAi plants under drought stress.

The adjusted  $p$ -values indicate which pathways are more likely to have biological significance. The red dots indicate low adjusted  $p$ -values (high enrichment), and the blue dots indicate high adjusted  $p$ -values (low enrichment). Gene Ratio indicates the ratio of gene numbers annotated to a pathway among Supplementary data 3. Count: count of genes.

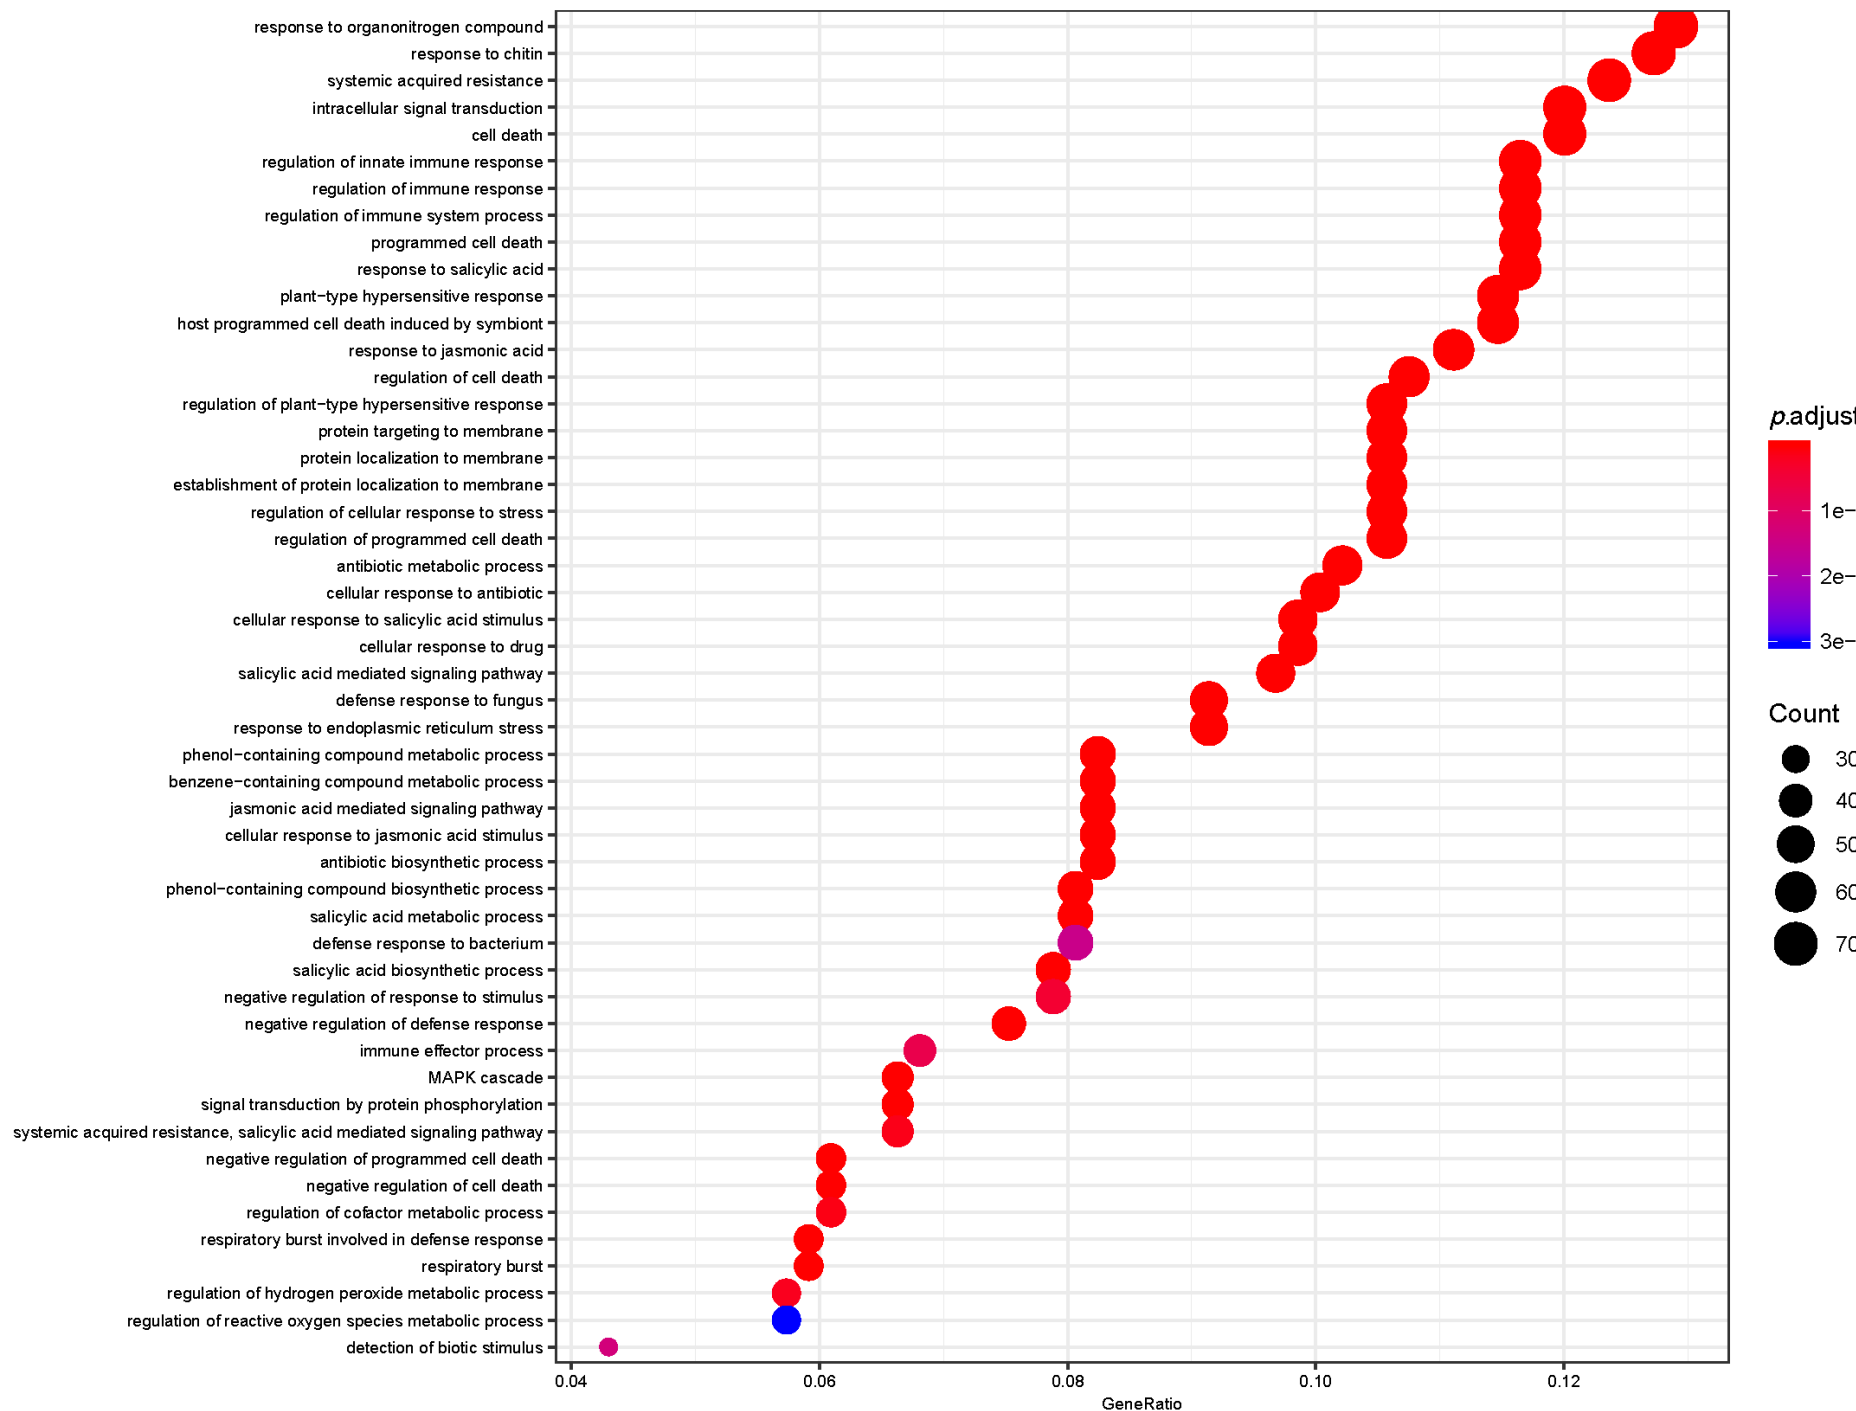

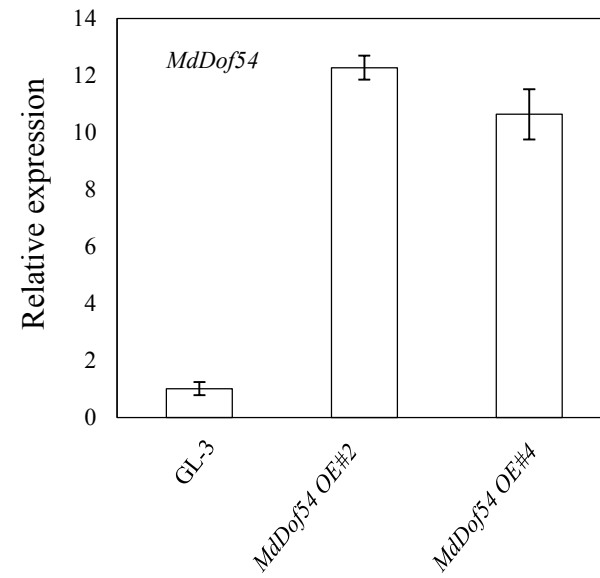

**Supplementary Figure 5. Generation of *MdDof54* overexpression plants.**

*MdDof54* mRNA levels were detected in the *MdDof54* overexpression plants.

Error bars indicate standard deviation ( $n = 3$ ).

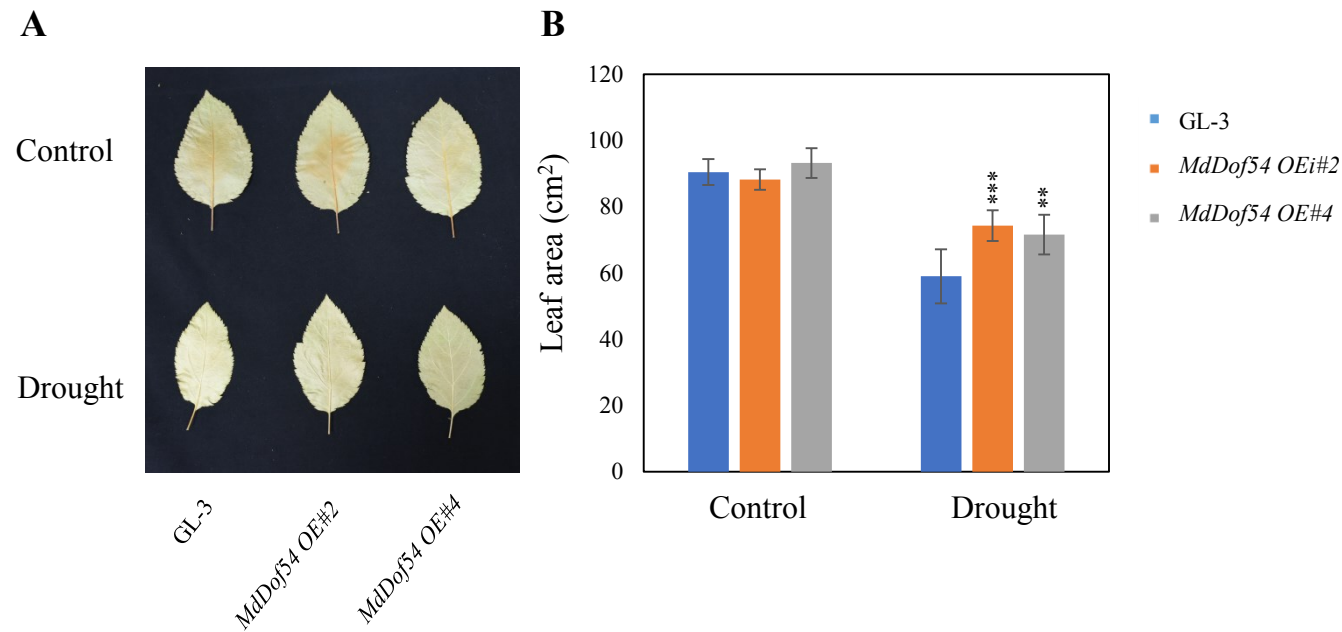

**Supplementary Figure 6. Leaf area of *MdDof54* overexpression plants under drought.** Two-month-old plants were transferred to a greenhouse for one additional month and then exposed to a moderate drought treatment for two months. Oven dried leaf (A) and leaf area (B) of GL-3 and *MdDof54* OE plants. Error bars indicate standard errors ( $n = 15$ ). Asterisks indicate significant differences between GL-3 and transgenic lines based on one-way ANOVA and Tukey's test (\*,  $p < 0.05$ ; \*\*,  $p < 0.01$ ; \*\*\*,  $p < 0.001$ ). Error bars indicate standard deviation. OE, overexpression.

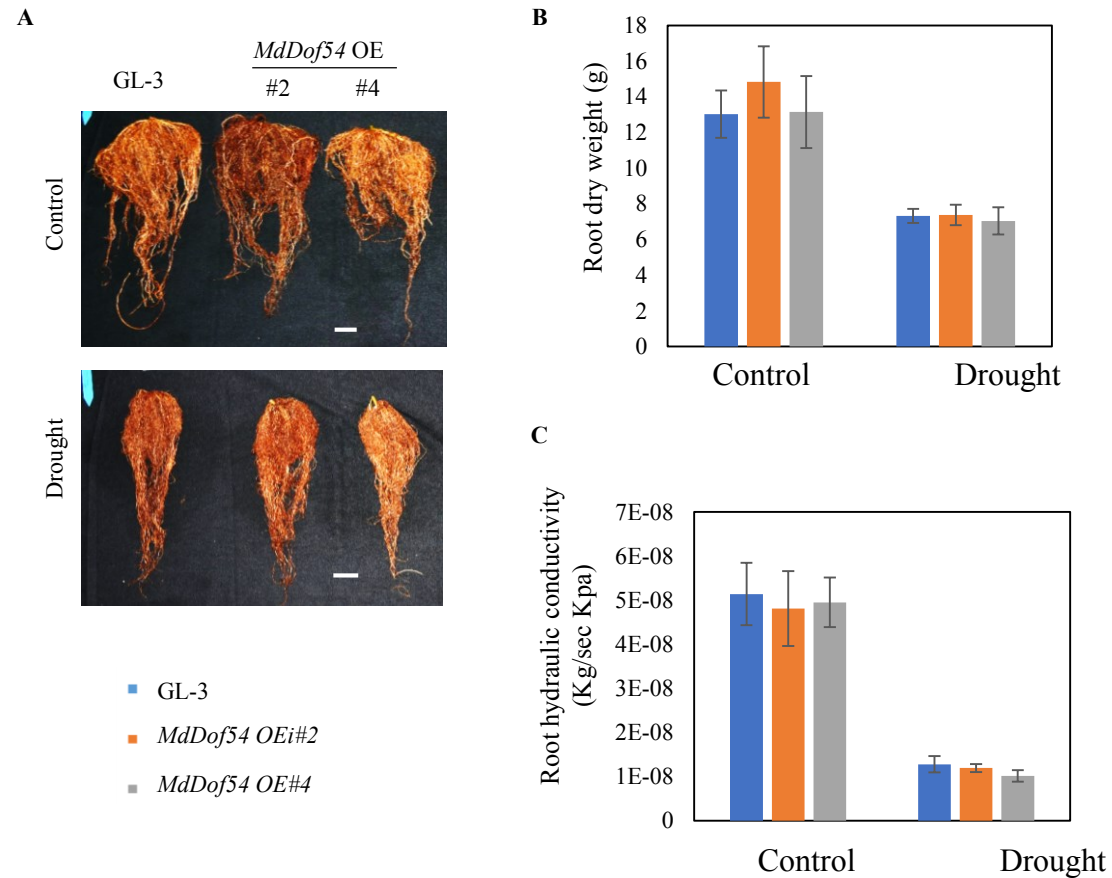

**Supplementary Figure 7. Root development and hydraulic conductivity of *MdDof54* OE plants under long-term drought stress.** Two-month-old plants were transferred to a greenhouse for one additional month and then exposed to a moderate drought treatment for two months. (A) Morphological characteristics of roots from GL-3 and *MdDof54* RNAi plants after drought stress. Bar = 5cm. (B)–(C) Root dry weight (B) and root hydraulic conductivity (C) of GL-3 and *MdDof54* OE plants after drought stress. Asterisks indicate significant differences between GL-3 and transgenic lines based on one-way ANOVA and Tukey’s test (\*,  $p < 0.05$ ; \*\*,  $p < 0.01$ ; \*\*\*,  $p < 0.001$ ). Error bars indicate standard deviation ( $n = 15$ ). OE, overexpression.
